# Supplementary material
Source: Springer Nature journal article supplement (https://www.springermedizin.de/resource/supplementary/12895_2011_126_MOESM2_ESM.pdf/9514192)

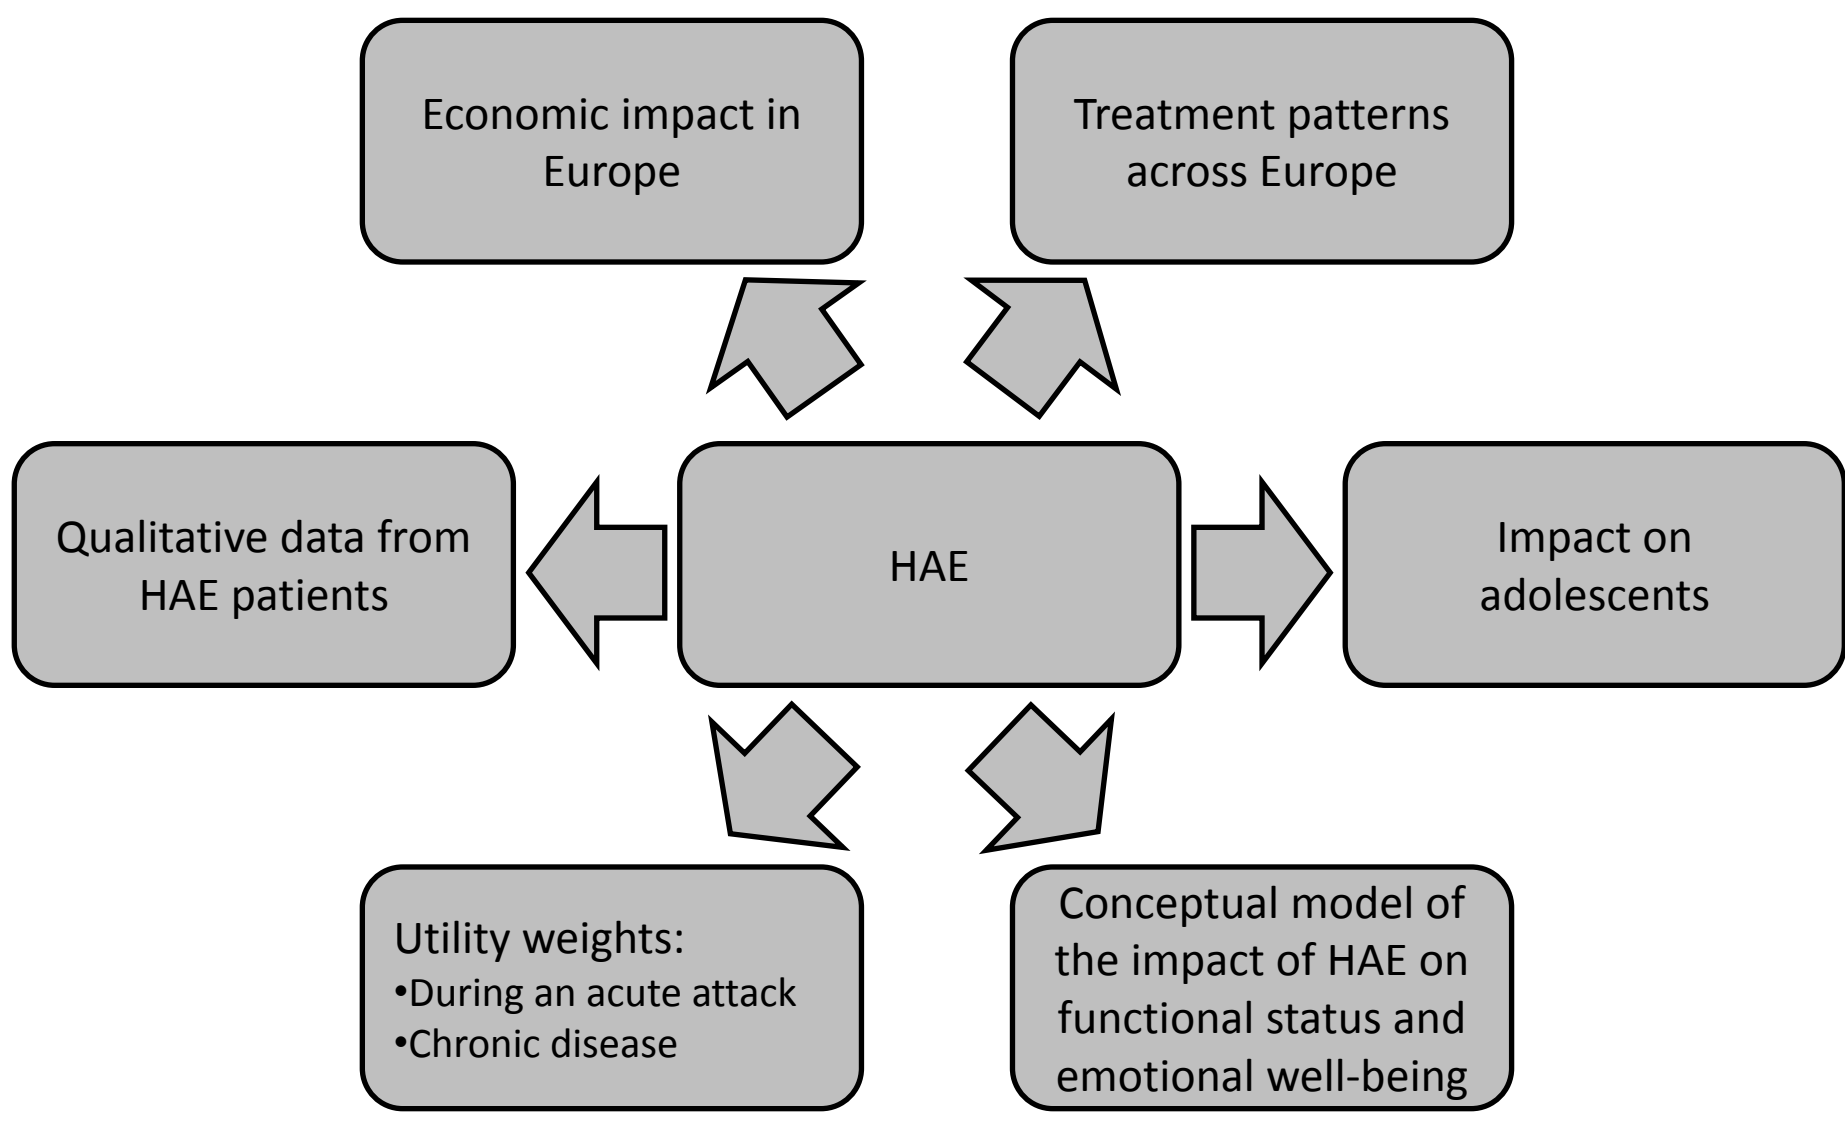

Supplement: MOESM2 [file 9514192]
